# Supplementary material for: Cordycepin Inhibits Lipopolysaccharide (LPS)-Induced Tumor Necrosis Factor (TNF)-α Production via Activating AMP-Activated Protein Kinase (AMPK) Signaling
Source: PubMed Central journal article supplement (PMC4139833; doi:10.3390/ijms150712119), 2014-07-08

## Supplementary Information

**Figure S1.** RAW 264.7 cells were either left untreated, or stimulated with 0.1  $\mu\text{g}/\text{mL}$  of LPS (lipopolysaccharide), co-supplemented with cordycepin (10  $\mu\text{M}$ ) for indicated time points; TNF $\alpha$  (tumor necrosis factor  $\alpha$ ) in culture supernatant was measured with an ELISA kit (A); and cell viability was analyzed by MTT (Thiazolyl Blue Tetrazolium Bromide) assay (B). The results presented were representative of three independent experiments. The values were expressed as the means  $\pm$  SD. #  $p < 0.05$ .

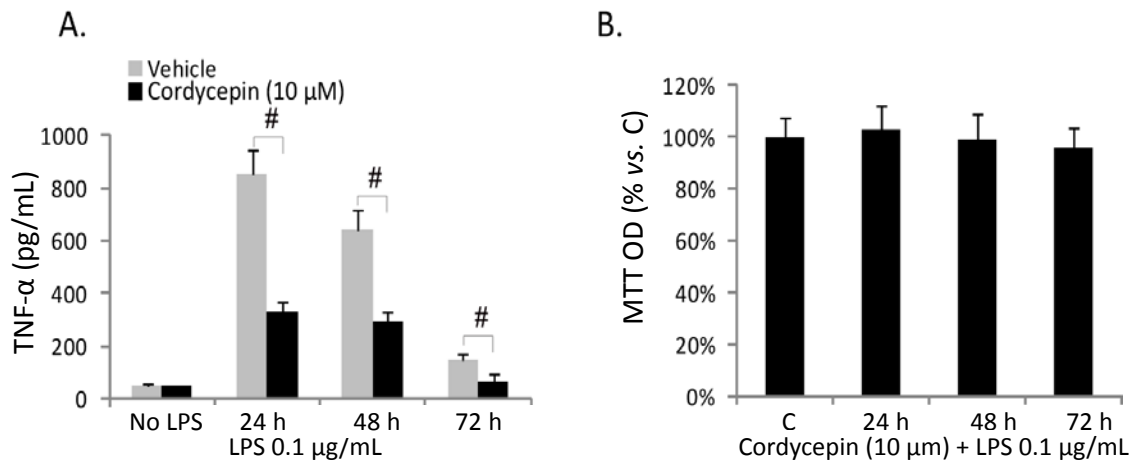

Supplement: ijms-15-12119-s001.pdf [file ijms-15-12119-s001.pdf]
